# Supplementary material
Source: PubMed Central journal article supplement (PMC10287842)
Supplement: NIHMS1854377-supplement-1.pdf [file NIHMS1854377-supplement-1.pdf]

**Supplemental Table 1. Obesity ICD-10 codes for inclusion**

| ICD-10 Code | Description                                                                       |
|-------------|-----------------------------------------------------------------------------------|
| Z6854       | Body mass index [BMI] pediatric, greater than or equal to 95th percentile for age |
| E669        | Obesity, unspecified                                                              |
| E6609       | Other obesity due to excess calories                                              |
| E6601       | Morbid (severe) obesity due to excess calories                                    |
| E668        | Other obesity                                                                     |
| Z6841       | Body mass index [BMI] 40.0-44.9, adult                                            |
| Z6830       | Body mass index [BMI] 30.0-30.9, adult                                            |
| Z6832       | Body mass index [BMI] 32.0-32.9, adult                                            |
| Z6831       | Body mass index [BMI] 31.0-31.9, adult                                            |
| Z6833       | Body mass index [BMI] 33.0-33.9, adult                                            |
| Z6842       | Body mass index [BMI] 45.0-49.9, adult                                            |
| Z6835       | Body mass index [BMI] 35.0-35.9, adult                                            |
| Z6839       | Body mass index [BMI] 39.0-39.9, adult                                            |
| Z6834       | Body mass index [BMI] 34.0-34.9, adult                                            |
| Z6836       | Body mass index [BMI] 36.0-36.9, adult                                            |
| Z6837       | Body mass index [BMI] 37.0-37.9, adult                                            |
| Z6838       | Body mass index [BMI] 38.0-38.9, adult                                            |
| E662        | Morbid (severe) obesity with alveolar hypoventilation                             |
| Z6843       | Body mass index [BMI] 50.0-59.9, adult                                            |
| Z6844       | Body mass index [BMI] 60.0-69.9, adult                                            |
| Z6845       | Body mass index [BMI] 70 or greater, adult                                        |
| E660        | Obesity due to excess calories                                                    |
